# Supplementary figures and images for: Spontaneous and evoked activity patterns diverge over development
Source: eLife journal article supplement (doi:10.7554/elife.61942), 2021-04-19

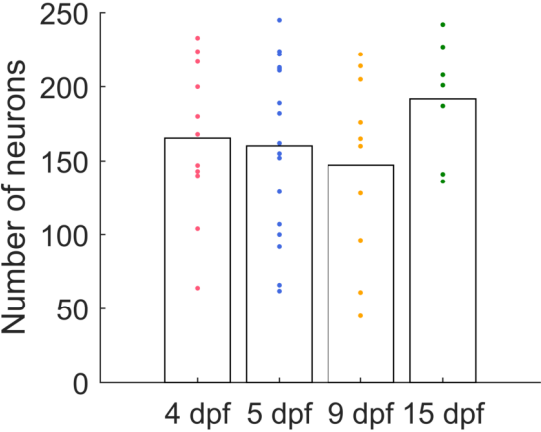

Supplement: supp [file elife_poa_e61942_Figure_1_figure_supplement_1.pdf › elife_poa_e61942_Figure_1_figure_supplement_1.pdf]

A

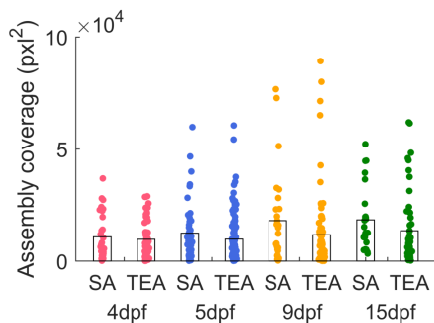

B

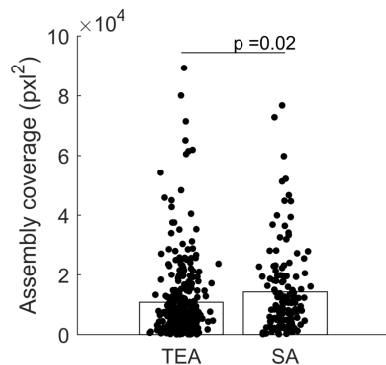

C

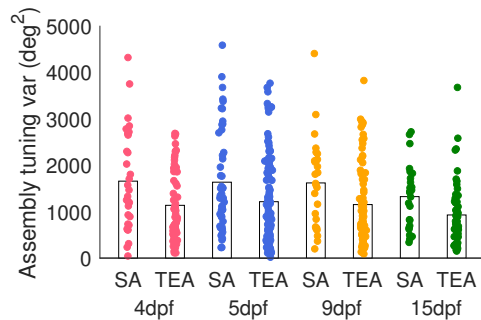

D

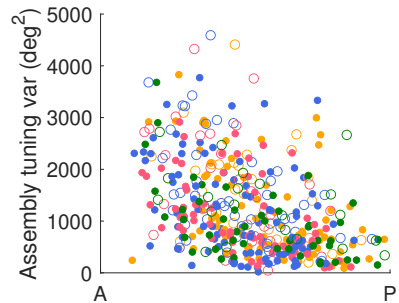

Supplement: supp [file elife_poa_e61942_Figure_2_figure_supplement_1.pdf › elife_poa_e61942_Figure_2_figure_supplement_1.pdf]

A

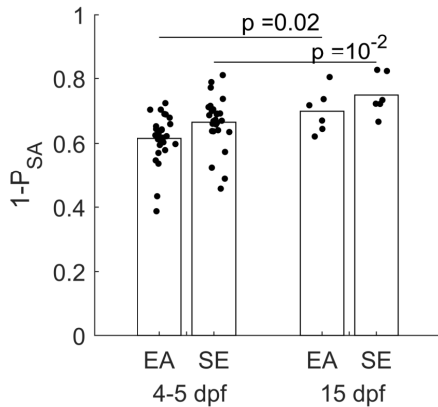

B

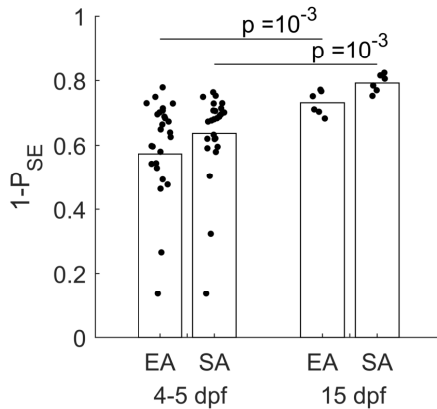

Supplement: supp [file elife_poa_e61942_Figure_3_figure_supplement_1.pdf › elife_poa_e61942_Figure_3_figure_supplement_1.pdf]
